# Supplementary material for: The Clinical Pulmonary Infection Score Combined with Procalcitonin and Lung Ultrasound (CPIS-PLUS), a Good Tool for Ventilator Associated Pneumonia Early Diagnosis in Pediatrics
Source: MDPI journal article supplement (doi:10.3390/children11050592), 2024-05-14

**Supplementary Materials:** The following supporting information can be downloaded at: [www.mdpi.com/xxx/s1](http://www.mdpi.com/xxx/s1), Figure S1: title; Table S1: title; Video S1: title.

**Table S1. CDC diagnostic criteria**

| Imaging Test Evidence                                                                                                                                                                                                                               | Signs/Symptoms                                                                                                                                                                                                                                                                                                                                                                                                                                                                                                                                                                                                                                                                                                                                                                                                                                                                                                                                                                                                                                                                                                                                                                                                                                                                                                                                                                                                                                                                                                                                                                                                                                                                                                                                                                                                                                                                                                                                                                   |
|-----------------------------------------------------------------------------------------------------------------------------------------------------------------------------------------------------------------------------------------------------|----------------------------------------------------------------------------------------------------------------------------------------------------------------------------------------------------------------------------------------------------------------------------------------------------------------------------------------------------------------------------------------------------------------------------------------------------------------------------------------------------------------------------------------------------------------------------------------------------------------------------------------------------------------------------------------------------------------------------------------------------------------------------------------------------------------------------------------------------------------------------------------------------------------------------------------------------------------------------------------------------------------------------------------------------------------------------------------------------------------------------------------------------------------------------------------------------------------------------------------------------------------------------------------------------------------------------------------------------------------------------------------------------------------------------------------------------------------------------------------------------------------------------------------------------------------------------------------------------------------------------------------------------------------------------------------------------------------------------------------------------------------------------------------------------------------------------------------------------------------------------------------------------------------------------------------------------------------------------------|
| Two or more serial chest imaging test results with at least one of the following:                                                                                                                                                                   | For ANY PATIENT, at least one of the following: <ul style="list-style-type: none"> <li>- Fever (<math>&gt; 38.0^{\circ}\text{C}</math> or <math>&gt; 100.4^{\circ}\text{F}</math>)</li> <li>- Leukopenia (<math>\leq 4000</math> WBC/mm<sup>3</sup>) or leukocytosis (<math>\geq 12,000</math> WBC/mm<sup>3</sup>)</li> <li>- For adults <math>\geq 70</math> years old, altered mental status with no other recognized cause</li> </ul>                                                                                                                                                                                                                                                                                                                                                                                                                                                                                                                                                                                                                                                                                                                                                                                                                                                                                                                                                                                                                                                                                                                                                                                                                                                                                                                                                                                                                                                                                                                                         |
| New and persistent or progressive and persistent <ul style="list-style-type: none"> <li>- Infiltrate</li> <li>- Consolidation</li> <li>- Cavitation</li> <li>- Pneumatoceles, in infants <math>\leq 1</math> year old</li> </ul>                    | And at least two of the following (from separate bullets): <ul style="list-style-type: none"> <li>- New onset of purulent sputum (*) or change in character of sputum (color, consistency, odor, and quantity), or increased respiratory secretions, or increased suctioning requirements</li> <li>- Dyspnea, or tachypnea (**), or new onset or worsening cough</li> <li>- Rales (crackles) or bronchial breath sounds</li> <li>- Worsening gas exchange (for example, O<sub>2</sub> desaturations [for example, PaO<sub>2</sub>/FiO<sub>2</sub> <math>\leq 240</math>], increased oxygen requirements, or increased ventilator demand)</li> </ul>                                                                                                                                                                                                                                                                                                                                                                                                                                                                                                                                                                                                                                                                                                                                                                                                                                                                                                                                                                                                                                                                                                                                                                                                                                                                                                                              |
| Note: In patients without underlying pulmonary or cardiac disease (such as respiratory distress syndrome, bronchopulmonary dysplasia, pulmonary edema, or chronic obstructive pulmonary disease), one definitive imaging test result is acceptable. | <p>ALTERNATE CRITERIA, for infants <math>\leq 1</math> year old: Worsening gas exchange (for example, O<sub>2</sub> desaturations [for example, pulse oximetry <math>&lt; 94\%</math>], increased oxygen requirements, or increased ventilator demand)</p> <p>And at least three of the following (from separate bullets):</p> <ul style="list-style-type: none"> <li>- Temperature instability</li> <li>- Leukopenia (<math>\leq 4000</math> WBC/mm<sup>3</sup>) or leukocytosis (<math>\geq 15,000</math> WBC/mm<sup>3</sup>) and left shift (<math>\geq 10\%</math> band forms)</li> <li>- New onset of purulent sputum (*) or change in character of sputum (color, consistency, odor, and quantity), or increased respiratory secretions, or increased suctioning requirements</li> <li>- Apnea, tachypnea (**), nasal flaring with retraction of chest wall, or nasal flaring with grunting</li> <li>- Wheezing, rales (crackles), or rhonchi</li> <li>- Cough</li> <li>- Bradycardia (<math>&lt; 100</math> beats/min) or tachycardia (<math>&gt; 170</math> beats/min)</li> </ul> <p>ALTERNATE CRITERIA, for child <math>&gt; 1</math> year old or <math>\leq 12</math> years old, at least three of the following (from separate bullets):</p> <ul style="list-style-type: none"> <li>- Fever (<math>&gt; 38.0^{\circ}\text{C}</math> or <math>&gt; 100.4^{\circ}\text{F}</math>) or hypothermia (<math>&lt; 36.0^{\circ}\text{C}</math> or <math>&lt; 96.8^{\circ}\text{F}</math>)</li> <li>- Leukopenia (<math>\leq 4000</math> WBC/mm<sup>3</sup>) or leukocytosis (<math>\geq 15,000</math> WBC/mm<sup>3</sup>)</li> <li>- New onset of purulent sputum (*) or change in character of sputum (color, consistency, odor, and quantity), or increased respiratory secretions, or increased suctioning requirements</li> <li>- Dyspnea, or apnea, or tachypnea (**), or new onset or worsening cough</li> <li>- Rales (crackles) or bronchial breath sounds</li> </ul> |

- 
- Worsening gas exchange (for example, O<sub>2</sub> desaturations [for example, pulse oximetry < 94%], increased oxygen requirements, or increased ventilator demand)
- 

\* Purulent sputum is defined as secretions from the lungs, bronchi, or trachea that contain  $\geq 25$  neutrophils and  $\leq 10$  squamous epithelial cells per low power field (x100).

\*\* In adults, tachypnea is defined as respiration rate > 25 breaths per minute. Tachypnea is defined as > 75 breaths per minute in premature infants born at < 37 weeks gestation and until the 40th week; > 60 breaths per minute in patients < 2 months old; > 50 breaths per minute in patients 2- 12 months old; and > 30 breaths per minute in children > 1 year old.

**Table S2. Threshold values for cultured specimens used in the diagnosis of pneumonia**

| Specimen collection/technique                        | Values                   |
|------------------------------------------------------|--------------------------|
| Lung tissue†                                         | $\geq 10^4$ CFU/g tissue |
| Bronchoscopically (B) obtained specimens             |                          |
| Bronchoalveolar lavage (B-BAL)                       | $\geq 10^4$ CFU/ml       |
| Protected BAL (B-PBAL)                               | $\geq 10^4$ CFU/ml       |
| Protected specimen brushing (B-PSB)                  | $\geq 10^3$ CFU/ml       |
| Nonbronchoscopically (NB) obtained (blind) specimens |                          |
| NB-BAL                                               | $\geq 10^4$ CFU/ml       |
| NB-PSB                                               | $\geq 10^3$ CFU/ml       |
| Endotracheal aspirate (ETA)                          | $\geq 10^5$ CFU/ml       |

CFU = colony forming units, g = gram, ml = milliliter

†Lung tissue specimens obtained by either open or closed lung biopsy methods. For post-mortem specimens, only lung tissue specimens obtained by transthoracic or transbronchial biopsy that are collected immediately post-mortem are eligible for use.

**Figure S1. Comparison of CXR and LUS findings in the same patient**

This patient has been diagnosed with confirmed VAP. The CXR (image 1) showed a retrocardiac consolidation in the left inferior lung lobe. LUS (image 2) revealed a consolidation with a fragmented pleural line, tissue-like pattern and shred sign (♦) in the posterior segment of the left lung. This consolidation was unilateral, about 40 mm in size and was observed with a dynamic air bronchogram (\*), and also fluid bronchogram. Confluent, trailing B-lines were observed around the consolidation. The application of color Doppler demonstrated vascularization into the consolidation (image 3).

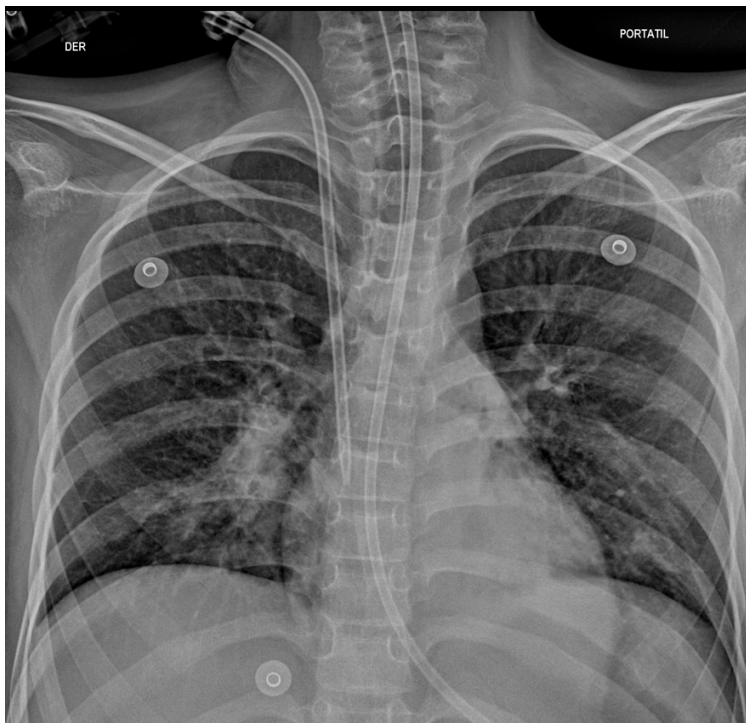

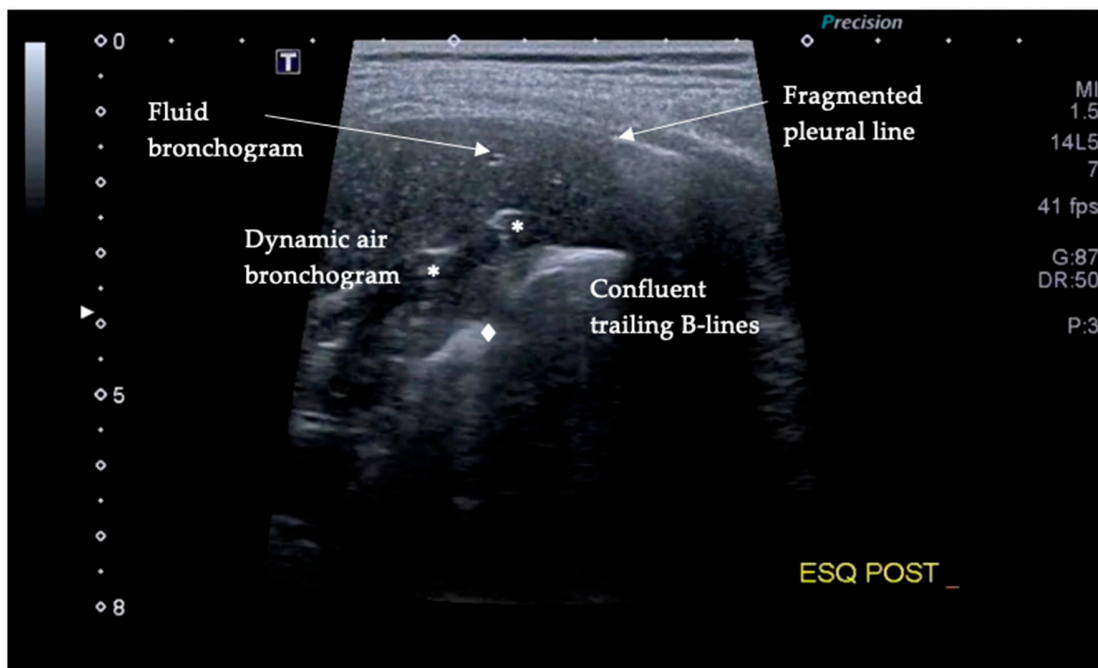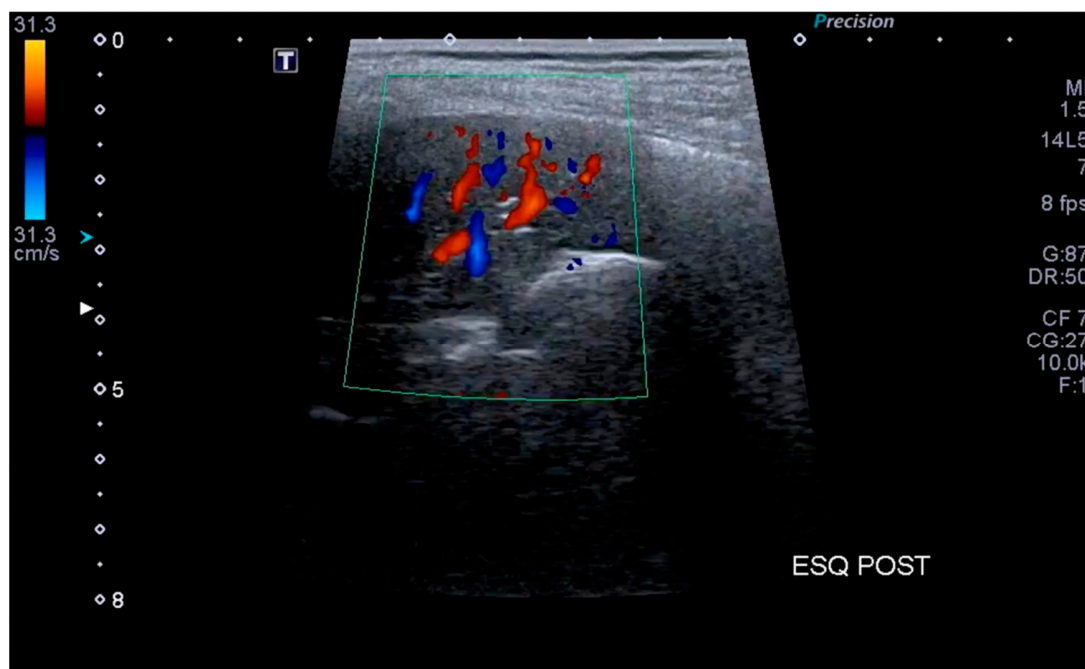

Supplement: s1 [file s1]
